# Supplementary material for: Klima, Krise, Konzeption: Der ganzheitliche Blick
Source: Springer Nature journal article supplement (doi:10.1007/s43877-023-0755-8), 2023-03-01
Supplement: MOESM1 [file 24607322]

## Literatur

### zum Beitrag „Klima, Krise, Konzeption: Der ganzheitliche Blick“ von Joachim Graf und Harald Abele

HebammenWissen (4) 2/2023, S. 46-49

Boyle MD, Kavi LK, Louis LM, et al. (2021) Occupational Exposures to Phthalates among Black and Latina U.S. Hairdressers Serving an Ethnically Diverse Clientele: A Pilot Study. *Environ Sci Technol.* 55(12):8128-8138. doi:10.1021/acs.est.1c00427

Brucker SY, Simoes E (2021) Gynäkologie und Geburtshilfe. In: Traidl-Hoffmann C, Schulz CM, Herrmann M, Simon B (Hrsg.). *Planetary Health: Klima, Umwelt und Gesundheit im Anthropozän.* Berlin: Medizinisch Wissenschaftliche Verlagsgesellschaft, S. 131-143.

Brucker SY, Simoes E. (2023) Ausblick. In: Brucker SY, Doubek K, Scharl A, Simoes E, Wallwiener D (Hrsg.). *Frauengesundheit – Frauenmedizin. Fachübergreifend und kompakt.* München: Elsevier Verlag, S. 219-228.

Bundesgesetzblatt (2020) Studien- und Prüfungsverordnung für Hebammen (HebStPrV). *Bundesgesetzblatt; (I/2):* 39-62.

Cairns A, Jones VM, Cronin K, et al. (2022) Impact of the COVID-19 Pandemic on Breast Cancer Screening and Operative Treatment. *Am Surg.* 88(6):1051-1053. doi:10.1177/00031348221087920

Dahlgren G, Whitehead M (1991) *Policies and strategies to promote social equity in health.* Stockholm: Institute for Future Studies.

Daniel H, Erickson SM, Bornstein SS, et al. (2018) Women's Health Policy in the United States: An American College of Physicians Position Paper. *Ann Intern Med.* 168(12):874-875. doi:10.7326/M17-3344

Desai Z, Zhang Y. *Climate Change and Women's Health (2021) A Scoping Review.* *Geohealth* 5(9):e2021GH000386. Published 2021 Sep 1. doi:10.1029/2021GH000386

Duffy SW, Seedat F, Kearins O et al. (2022) The projected impact of the COVID-19 lockdown on breast cancer deaths in England due to the cessation of population screening: a national estimation. *Br J Cancer;* 126: 1355–1361. <https://doi.org/10.1038/s41416-022-01714-9>

Gascon M, Casas M, Morales E, et al. (2015) Prenatal exposure to bisphenol A and phthalates and childhood respiratory tract infections and allergy. *J Allergy Clin Immunol.* 135(2):370-378. doi:10.1016/j.jaci.2014.09.030

Giudice LC, Llamas-Clark EF, DeNicola N, et al. (2021) Climate change, women's health, and the role of obstetricians and gynecologists in leadership. *Int J Gynaecol Obstet.* 155(3):345-356. doi:10.1002/ijgo.13958

Glover V, O'Donnell KJ, O'Connor TG, Fisher J. (2018) Prenatal maternal stress, fetal programming, and mechanisms underlying later psychopathology-A global perspective. *Dev Psychopathol.* 30(3):843-854. doi:10.1017/S095457941800038X

Graf J, Abele H, Boer B. (2022) Brustkrebs in der Schwangerschaft. Interdisziplinäre Versorgung komplexer Verläufe. *HebammenWissen* 3(4): 50-53. Doi: 10.1007/s43877-022-0716-7

Greer SL, Falkenbach M, Siciliani L, McKee M, Wismar M, Figueras J. (2022) From Health in All Policies to Health for All Policies. *Lancet Public Health* 7(8):e718-e720. doi:10.1016/S2468-2667(22)00155-4

Harville E, Xiong X, Buekens P. (2010) Disasters and perinatal health: a systematic review. *Obstet Gynecol Surv.* 65(11):713-728. doi:10.1097/OGX.0b013e31820eddb

Henderson NB, Sears CG, Calafat A, Chen A, Lanphear B, Romano M, Yolton K, Braun JM (2020) Associations of Breast Milk Consumption with Urinary Phthalate and Phenol Exposure Biomarkers in Infants. *Environ. Sci. Technol. Lett.* 7(10):733–739. <https://doi.org/10.1021/acs.estlett.0c00450>

Heft-Neal S, Driscoll A, Yang W, Shaw G, Burke M. (2022) Associations between wildfire smoke exposure during pregnancy and risk of preterm birth in California. *Environ Res.* 203:111872. doi:10.1016/j.envres.2021.111872

Horton R, Beaglehole R, Bonita R, Raeburn J, McKee M, Wall S. (2014) From public to planetary health: a manifesto. *Lancet* 383(9920):847. doi:10.1016/S0140-6736(14)60409-8

Horton R, Lo S (2015) Planetary health: a new science for exceptional action [published correction appears in *Lancet* 386(10007):1944]. *Lancet.* 2015;386(10007):1921-1922. doi:10.1016/S0140-6736(15)61038-8

Hwang J, Bae H, Choi S, Yi H, Ko B, Kim N. (2020) Impact of air pollution on breast cancer incidence and mortality: a nationwide analysis in South Korea. *Sci Rep.* 10(1):5392. doi:10.1038/s41598-020-62200-x

Jahreis S, Trump S, Bauer M, et al. (2028) Maternal phthalate exposure promotes allergic airway inflammation over 2 generations through epigenetic modifications. *J Allergy Clin Immunol.* 141(2):741-753. doi:10.1016/j.jaci.2017.03.017

Jegasothy E, Randall DA, Ford JB, Nippita TA, Morgan GG (2022) Maternal factors and risk of spontaneous preterm birth due to high ambient temperatures in New South Wales, Australia. *Paediatr Perinat Epidemiol.* 36(1):4-12. doi:10.1111/ppe.12822

Kische H, Haring R (2022) Geschlecht und Gesundheit – Grundlagen einer geschlechtssensiblen Medizin und Gesundheitsvorsorge. In: Haring R. (Hrsg.) *Gesundheitswissenschaften.* Berlin, Heidelberg: Springer-Verlag, S. 573–585.

Kuehn L, McCormick S (2017) Heat exposure and maternal health in the face of climate change. *Int J Environ Res Public Health* 14: 853- 861.

Main KM, Mortensen GK, Kaleva MM, et al. (2006) Human breast milk contamination with phthalates and alterations of endogenous reproductive hormones in infants three months of age. *Environ Health Perspect* 114(2):270-276. doi:10.1289/ehp.8075

Marí-Dell'Olmo M, Tobías A, Gómez-Gutiérrez A, et al. (2019) Social inequalities in the association between temperature and mortality in a South European context. *Int J Public Health* 64(1):27-37. doi:10.1007/s00038-018-1094-6

McCall T, Beckmann S, Kawe C, Abel F, Hornberg C. (2019) Climate change adaptation and mitigation – a hitherto neglected gender-sensitive public health perspective, *Climate and Development* 11(9):735-744, DOI: 10.1080/17565529.2018.1529551

Meaney S, Leitao S, Olander EK, Pope J, Matvienko-Sikar K. (2022) The impact of COVID-19 on pregnant women's experiences and perceptions of antenatal maternity care, social support, and stress-reduction strategies. *Women Birth* 35(3):307-316. doi:10.1016/j.wombi.2021.04.013

McNeely E, Mordukhovich I, Staffa S, Tideman S, Gale S, Coull B (2018) Cancer prevalence among flight attendants compared to the general population. *Environ Health*. 17(1):49. Published 2018 Jun 26. doi:10.1186/s12940-018-0396-8

Müller O, Jahn A, Gabrys S (2018) Planetary Health. Ein umfassendes Gesundheitskonzept. *Dtsch Arztebl*. 115 (40): A 1751–2.

Pacheco SE (2020) Catastrophic effects of climate change on children's health start before birth. *J Clin Invest*. 130: 562- 564.

Solla Negrao EM, Cabello C, Conz L, Mauad EC, Zeferino LC, Vale DB (2022) The impact of the COVID-19 pandemic on breast cancer screening and diagnosis in a Brazilian metropolitan area. *J Med Screen*. 9691413221122055. doi:10.1177/09691413221122055

Sorensen C, Murray V, Lemery J, Balbus J (2018) Climate change and women's health: Impacts and policy directions. *PLoS Med*. 15(7):e1002603. doi:10.1371/journal.pmed.1002603

Universität Tübingen (2022) Modulhandbuch Hebammenwissenschaft und Frauengesundheit, Master of Science (M.Sc.). Tübingen. URL: [van Daalen K, Jung L, Dhatt R, Phelan AL \(2020\) Climate change and gender-based health disparities. \*Lancet Planet Health\* 4\(2\):e44-e45. doi:10.1016/S2542-5196\(20\)30001-2](https://uni-tuebingen.de/securedl/sdl-eyJ0eXAiOiJKV1QiLCJhbGciOiJIUzI1NiJ9.eyJpYXQiOiJlE2NzQyMTM5MjMsImV4cCI6MTY3NDMwMzIxOCwidXNlciI6MCwiZ3JvdXBzIjpbMCwtMV0sImZpbGUiOiJmaWxYWRtaW5cL1VuaV9UdWVhW5nZW5cL0Zha3VsdGFldGVuXC9NZWRpemluXC9EZWthbmF0XC9TdHVkaWVuZGVrYW5hdFwvRG9jdW1lbnRlIXN1bmRoZWl0c2ZyY2hiZXJlZmVcl0hYmFtbWVud2lzc2Vuc2NoYWZ0XC8yMDIyL0DkxOH0.AQxcNyBBnJ_ZlXM94n2juz33p9jHbLLJ6_AYhK59Tlc/2022-11-17_Modulhandbuch_Masterstudiengang_END.pdf (Zugriff: 20.01.2023).</p></div><div data-bbox=)

Whitmee S, Haines A, Beyrer C, et al. (2015) Safeguarding human health in the Anthropocene epoch: report of The Rockefeller Foundation-Lancet Commission on planetary health [published correction appears in *Lancet* 386(10007):1944]. *Lancet* 386(10007):1973-2028. doi:10.1016/S0140-6736(15)60901-1

WHO (2014) Gender, Climate Change and Health. Geneva. URL: [https://apps.who.int/iris/bitstream/handle/10665/144781/9789241508186\\_eng.pdf](https://apps.who.int/iris/bitstream/handle/10665/144781/9789241508186_eng.pdf) (Zugriff: 19.01.2023).

Xiao J, Huang M, Zhang W, et al. (2019) The immediate and lasting impact of Hurricane Sandy on pregnancy complications in eight affected counties of New York State. *Sci Total Environ*. 678:755-760. doi:10.1016/j.scitotenv.2019.04.436

Xue T, Guan T, Geng G, Zhang Q, Zhao Y, Zhu T. (2021) Estimation of pregnancy losses attributable to exposure to ambient fine particles in south Asia: an epidemiological case-control study. *Lancet Planet Health* 5(1):e15-e24. doi:10.1016/S2542-5196(20)30268-0
